# Supplementary material for: Temporal dynamics of cerebellar and motor cortex physiological processes during motor skill learning
Source: PubMed Central journal article supplement (PMC5238434; doi:10.1038/srep40715), 2017-01-16
Supplement: srep40715-s1.pdf [file srep40715-s1.pdf]

## Temporal dynamics of cerebellar and motor cortex physiological processes during motor skill learning

D. Spampinato<sup>1,2</sup> and P. Celnik<sup>2,3,4\*</sup>

<sup>1</sup>Department of Biomedical Engineering, <sup>2</sup>Department of Physical Medicine and Rehabilitation, <sup>3</sup>Department of Neuroscience, and <sup>4</sup>Department of Neurology, Johns Hopkins School of Medicine

### Supplementary Tables

**Supplementary Table S1. rMT and TS intensity**

|               | Day 1      | Day 2      | Paired t-test |          |
|---------------|------------|------------|---------------|----------|
| rMT           |            |            | T             | P-value  |
| Long          | 40.9 ± 1.7 | 40.7 ± 1.5 | t(9) = 0.56   | p = 0.59 |
| Short         | 41.8 ± 1.7 | 41.9 ± 1.8 | t(10) = 0.23  | p = 0.82 |
| Random        | 40.5 ± 1.9 | 40.3 ± 2.2 | t(7) = 0.61   | p = 0.56 |
| Unadjusted TS |            |            | T             | P-value  |
| Long          | 49.4 ± 1.6 | 49.0 ± 1.7 | t(9) = 0.35   | p = 0.73 |
| Short         | 51.8 ± 2.1 | 52.1 ± 2.3 | t(10) = 0.31  | p = 0.76 |
| Random        | 49.4 ± 2.5 | 49.2 ± 2.8 | t(7) = 0.25   | p = 0.81 |

**Supplementary Table S2. Adjusted TS intensity for CBI and SICI**

|             | Day 1 |            |            |            | Day 2 |            |            |            |
|-------------|-------|------------|------------|------------|-------|------------|------------|------------|
|             | Pre   | P1         | P2         | P3         | Pre   | P1         | P2         | P3         |
| Adjusted TS |       |            |            |            |       |            |            |            |
| MSO%        |       |            |            |            |       |            |            |            |
| Long        | -     | 48.9 ± 2.1 | 48.7 ± 1.9 | 49.6 ± 1.9 | -     | 48.5 ± 1.6 | 48.5 ± 1.6 | 48.4 ± 1.7 |
| Short       | -     | 51.6 ± 2.0 | -          | -          | -     | 51.3 ± 1.9 | -          | -          |
| Random      | -     | 48.6 ± 2.7 | 48.8 ± 2.5 | 48.9 ± 2.5 | -     | 49.0 ± 2.8 | 48.6 ± 2.9 | 48.8 ± 2.8 |
